# Supplementary material
Source: HighWire-hosted journal article supplement (https://thorax.bmj.com/content/76/4/335)
Supplement: inline-supplementary-material-1 [file inline-supplementary-material-1.pdf]

**Table S1 Clinical and demographic characteristics of the LGRC cohort**

|                                     | <b>COPD<br/>(N=209)</b> | <b>IPF (N=100)</b> | <b>Control (N=48)</b> |
|-------------------------------------|-------------------------|--------------------|-----------------------|
| <b>Age (years)</b>                  | 66 (59; 72)             | 65 (61; 71)        | 62 (50; 70)           |
| <b>Male (%)</b>                     | 118 (56.5)              | 67 (67.0)          | 19 (39.6)             |
| <b>Race N (%)</b>                   |                         |                    |                       |
| White                               | 202 (96.7)              | 92 (92.0)          | 42 (87.5)             |
| Black                               | 6 (2.9)                 | 3 (3.0)            | 3 (6.3)               |
| Other/unknown                       | 1 (0.5)                 | 5 (5.0)            | 3 (6.3)               |
| <b>Smoker N (%)</b>                 | 614                     | 220 (35.8)         | 66 (43.1)             |
| Current                             | 13 (6.2)                | 2 (2.0)            | 1 (2.0)               |
| Ever                                | 185 (88.5)              | 53 (53.5)          | 23 (47.9)             |
| Never                               | 11 (5.3)                | 44 (44.4)          | 20 (41.7)             |
| unknown                             | 0                       | 1 (1.0)            | 4 (8.3)               |
| <b>FEV<sub>1</sub>, % predicted</b> | 52 (27; 68)             | 72 (58; 83)        | 98 (88; 106)          |
| <b>FVC, % predicted</b>             | 75 (62; 88)             | 64 (51; 75)        | 93 (86; 99)           |
| <b>FEV<sub>1</sub>/FVC</b>          | 0.5 (0.4; 0.6)          | 0.8 (0.8;0.9)      | 0.8 (0.8;0.8)         |
| <b>DLCO, % predicted</b>            | 55 (38; 73)             | 49 (36; 61)        | 88 (78; 99)           |
| <b>LAA %</b>                        | 7.3 (1.3; 26.9)         | NA                 | NA                    |
